# Supplementary material
Source: HighWire-hosted journal article supplement (https://bmjopen.bmj.com/content/9/9/e031362)
Supplement: inline-supplementary-material-2 [file inline-supplementary-material-2.pdf]

### Search Strategy

This supplementary file contains a search strategy developed using the OVID platform combining MeSH terms and text words, and two search strategies that have been translated to other databases as appropriate.

#### Supplementary File 1.0. Search Strategy for Medline, Embase, EBM, and PsychInfo

| #  | Search Terms                                                                                                                    |
|----|---------------------------------------------------------------------------------------------------------------------------------|
| 1  | foster care/                                                                                                                    |
| 2  | (foster adj3 (care or home* or home care or welfare or organisation or famil* or child* or parent* or placement*)).tw.          |
| 3  | (out adj2 home adj2 (care or home* or home care or welfare or organisation or famil* or child* or parent* or placement*)).tw.   |
| 4  | (kinship adj3 (care or home* or home care or welfare or organisation or famil* or child* or parent* or placement*)).tw.         |
| 5  | (trauma informed adj3 (care or home* or home care or welfare or organisation or famil* or child* or parent* or placement*)).tw. |
| 6  | (resident* adj3 (care or home* or home care or welfare or organisation or famil* or child* or parent* or placement*)).tw.       |
| 7  | (guardian adj3 (care or home* or home care or welfare or organisation or famil* or child* or parent* or placement*)).tw.        |
| 8  | (family based adj3 (care or home* or home care or welfare or organisation or famil* or child* or parent* or placement*)).tw.    |
| 9  | (family centred adj3 (care or home* or home care or welfare or organisation or famil* or child* or parent* or placement*)).tw.  |
| 10 | (home based adj3 (care or home* or home care or welfare or organisation or famil* or child* or parent* or placement*)).tw.      |
| 11 | (child adj3 (protection or welfare or placement*)).tw.                                                                          |
| 12 | (non biological adj3 (care or home* or home care or welfare or organisation or famil* or child* or parent* or placement*)).tw.  |
| 13 | (group adj2 (home or house or care or home care or placement)).tw.                                                              |
| 14 | Oohc.tw.                                                                                                                        |
| 15 | or/2-14                                                                                                                         |
| 16 | 1 or 15                                                                                                                         |
| 17 | looked after child*.tw.                                                                                                         |
| 18 | (young adj3 (person or people)).tw.                                                                                             |
| 19 | infan*.tw.                                                                                                                      |
| 20 | baby.tw.                                                                                                                        |
| 21 | babies.tw.                                                                                                                      |
| 22 | toddler.tw.                                                                                                                     |
| 23 | preschool*.tw.                                                                                                                  |
| 24 | adolescen*.tw.                                                                                                                  |
| 25 | teen*.tw.                                                                                                                       |
| 26 | minor.tw.                                                                                                                       |
| 27 | youth.tw.                                                                                                                       |
| 28 | or/17-27                                                                                                                        |
| 29 | model.tw.                                                                                                                       |
| 30 | outcome.tw.                                                                                                                     |
| 31 | evaluation.tw.                                                                                                                  |
| 32 | framework.tw.                                                                                                                   |
| 33 | theor*.tw.                                                                                                                      |
| 34 | intervention.tw.                                                                                                                |
| 35 | program*.tw.                                                                                                                    |
| 36 | process*.tw.                                                                                                                    |
| 37 | prevention.tw.                                                                                                                  |
| 38 | treatment.tw.                                                                                                                   |
| 39 | strateg*.tw.                                                                                                                    |
| 40 | therap*.tw.                                                                                                                     |
| 41 | trauma informed.tw.                                                                                                             |
| 42 | trauma focused.tw.                                                                                                              |
| 43 | trauma services.tw.                                                                                                             |
| 44 | or/29-43                                                                                                                        |
| 45 | 16 and 28 and 44                                                                                                                |
| 46 | limit 45 to (english language and humans and yr="2008 -Current")                                                                |

**Supplementary File 1.1.** Search Strategy for CINAHL

| #   | Search Terms                                                                                                                                                                                            |
|-----|---------------------------------------------------------------------------------------------------------------------------------------------------------------------------------------------------------|
| S1  | (MH "Foster Home Care")                                                                                                                                                                                 |
| S2  | (foster N3 (care or home* or home care or welfare or organisation or famil* or child* or parent* or placement*))                                                                                        |
| S3  | (out N2 home N2 (care or home* or home care or welfare or organisation or famil* or child* or parent* or placement*))                                                                                   |
| S4  | (kinship N3 (care or home* or home care or welfare or organisation or famil* or child* or parent* or placement*))                                                                                       |
| S5  | (trauma informed N3 (care or home* or home care or welfare or organisation or famil* or child* or parent* or placement*))                                                                               |
| S6  | (resident* N3 (care or home* or home care or welfare or organisation or famil* or child* or parent* or placement*))                                                                                     |
| S7  | (guardian N3 (care or home* or home care or welfare or organisation or famil* or child* or parent* or placement*))                                                                                      |
| S8  | (family based N3 (care or home* or home care or welfare or organisation or famil* or child* or parent* or placement*))                                                                                  |
| S9  | (family centred N3 (care or home* or home care or welfare or organisation or famil* or child* or parent* or placement*))                                                                                |
| S10 | (home based N3 (care or home* or home care or welfare or organisation or famil* or child* or parent* or placement*))                                                                                    |
| S11 | (child N3 (protection or welfare or placement*))                                                                                                                                                        |
| S12 | (non biological N3 (care or home* or home care or welfare or organisation or famil* or child* or parent* or placement*))                                                                                |
| S13 | (group N2 (home or house or care or home care or placement))                                                                                                                                            |
| S14 | OOHC                                                                                                                                                                                                    |
| S15 | S1 OR S2 OR S3 OR S4 OR S5 OR S6 OR S7 OR S8 OR S9 OR S10 OR S11 OR S12 OR S13 OR S14                                                                                                                   |
| S16 | looked after child*                                                                                                                                                                                     |
| S17 | (young N3 (person or people))                                                                                                                                                                           |
| S18 | infan*                                                                                                                                                                                                  |
| S19 | baby                                                                                                                                                                                                    |
| S20 | babies                                                                                                                                                                                                  |
| S21 | toddlers                                                                                                                                                                                                |
| S22 | preschool*                                                                                                                                                                                              |
| S23 | adolescen*                                                                                                                                                                                              |
| S24 | teen*                                                                                                                                                                                                   |
| S25 | minors                                                                                                                                                                                                  |
| S26 | youth                                                                                                                                                                                                   |
| S27 | S16 OR S17 OR S18 OR S19 OR S20 OR S21 OR S22 OR S23 OR S24 OR S25 OR S26                                                                                                                               |
| S28 | (health or psychosocial) N3 (issue* or outcome* or need* or concern*)                                                                                                                                   |
| S29 | illness OR disease OR sickness OR condition                                                                                                                                                             |
| S30 | health*                                                                                                                                                                                                 |
| S31 | S28 OR S29 OR S30                                                                                                                                                                                       |
| S32 | S15 AND S27 AND S30                                                                                                                                                                                     |
| S33 | S15 AND S27 AND S30                                                                                                                                                                                     |
| S34 | model OR outcome OR evaluation OR framework OR theor* OR intervention OR program* OR process* OR prevention OR treatment OR strateg* OR therap* OR trauma informed OR trauma focused OR trauma services |
| S35 | S32 AND S34                                                                                                                                                                                             |

**Supplementary File 1.2.** Search Strategy for Sociological Abstracts

|                        | Search Terms                                                                                                                                                                                                                                              |
|------------------------|-----------------------------------------------------------------------------------------------------------------------------------------------------------------------------------------------------------------------------------------------------------|
| <b>Concept 1</b>       | Foster care OR foster* OR out of home OR kinship OR trauma informed OR resident* OR guardian care OR family based care OR family centred OR home based OR child protection OR child welfare OR non biological care OR group home OR group house OR 'OoHC' |
| <b>Concept 2 (AND)</b> | Looked after child OR young person OR young people OR infan* OR baby OR babies OR toddler OR preschool* OR adolescen* OR teen* OR minor OR youth                                                                                                          |
| <b>Concept 3 (AND)</b> | Model OR outcome OR evaluation OR framework OR theor* OR intervention OR program* OR process* OR prevention OR treatment OR strategy* OR therap* OR trauma informed OR trauma focused OR trauma service                                                   |
|                        | Limit to: peer reviewed                                                                                                                                                                                                                                   |
|                        | Language: English                                                                                                                                                                                                                                         |
|                        | Date: From 2008 to 2018                                                                                                                                                                                                                                   |
